# Supplementary material for: Cu-doped calcium phosphate supraparticles for bone tissue regeneration
Source: Royal Society of Chemistry journal article supplement (doi:10.1039/d4ra04769a), 2024-01-01
Supplement: d4ra04769a1.pdf [file d4ra04769a1.pdf]

## Electronic Supplementary Information

### Cu-doped calcium phosphate supraparticles for bone tissue regeneration

Anika Höppel,<sup>\*a</sup> Olivia Bahr,<sup>b</sup> Regina Ebert,<sup>b</sup> Annette Wittmer,<sup>c</sup> Michael Seidenstuecker,<sup>d</sup> M. Carolina Lanzino,<sup>e</sup> Uwe Gbureck<sup>f</sup> and Sofia Dembski<sup>a,g</sup>

<sup>a</sup> Department Tissue Engineering and Regenerative Medicine (TERM), University Hospital Würzburg, 97070 Würzburg, Germany.

<sup>b</sup> Department of Musculoskeletal Tissue Regeneration, University of Würzburg, 97074 Würzburg, Germany.

<sup>c</sup> Medical Center University of Freiburg, Faculty of Medicine, Institute for Microbiology and Hygiene, 79104 Freiburg, Germany.

<sup>d</sup> G.E.R.N. Center of Tissue Replacement, Regeneration & Neogenesis, Department of Orthopedics and Trauma Surgery, Faculty of Medicine, Albert-Ludwigs-University of Freiburg, 79106 Freiburg, Germany.

<sup>e</sup> Institute for Manufacturing Technologies of Ceramic Components and Composites (IFKB), University of Stuttgart, 70569 Stuttgart, Germany.

<sup>f</sup> Department for Functional Materials in Medicine and Dentistry, University of Würzburg, 97070 Würzburg, Germany.

<sup>g</sup> Fraunhofer Institute for Silicate Research ISC, 97082 Würzburg, Germany.

\* Correspondence: [sofia.dembski@isc.fraunhofer.de](mailto:sofia.dembski@isc.fraunhofer.de)

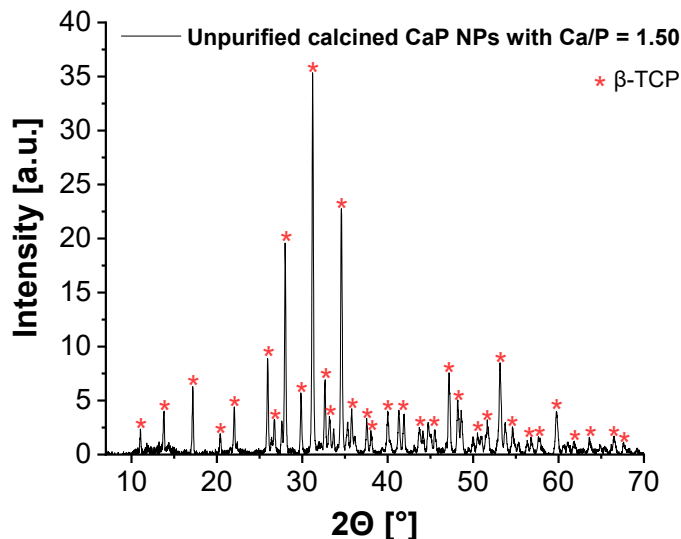

Figure S1. XRD pattern of unpurified CaP NPs with a molar ratio of Ca/P = 1.50 after calcination at 1000 °C.

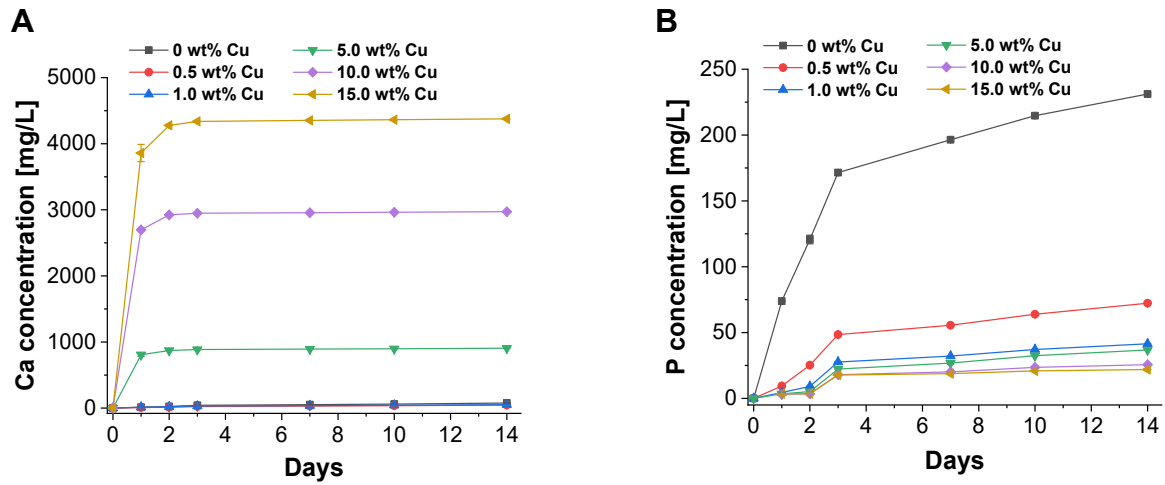

**Figure S2.** Ca (A) and P (B) cumulative release of Cu-doped CaP supraparticles (0 – 15.0 wt% Cu) in bi-distilled water over a period of 14 days.

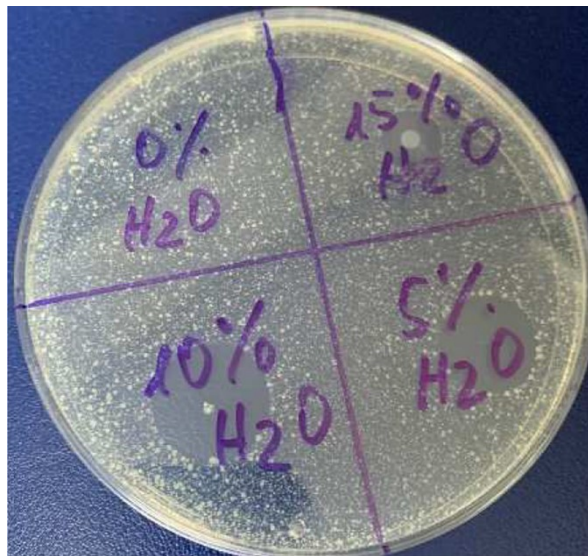

**Figure S3.** Results of ZOI after performing the inhibition test with *B. subtilis* using the 5.0 – 15.0 wt% Cu eluate as well as the 0 wt% Cu eluate as control.

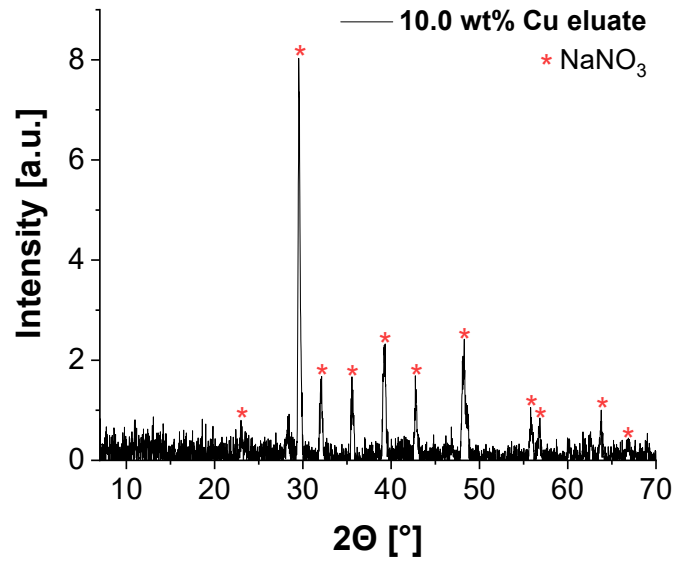

Figure S4. XRD pattern of freeze-dried 10.0 wt% Cu eluate.

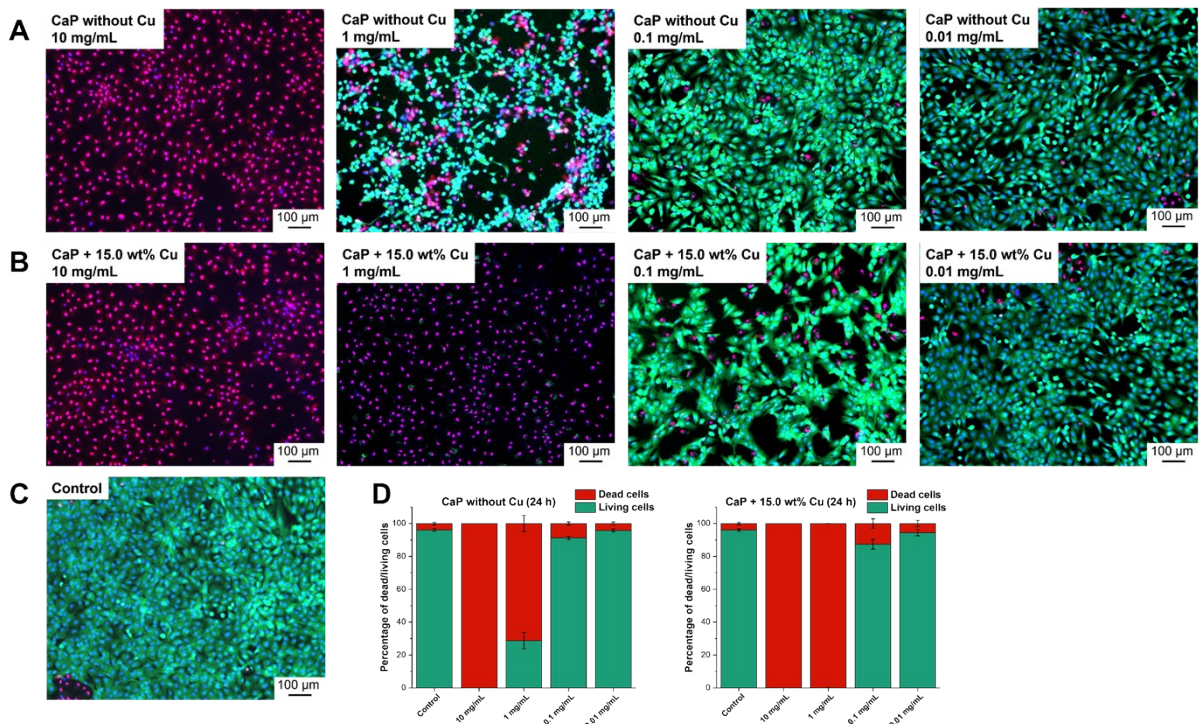

Figure S5. Live/dead staining 24 h after incubation with CaP supraparticles without (A) and with 15.0 wt% Cu (B) as well as of the control (C). **Green**: Fluorescence signal of living cells. **Magenta**: Fluorescence signal of dead cells. **Blue**: Fluorescence of cell nucleus. Representative images of three independent experiments are shown. (D) Percentage of dead/living cells of live/dead staining 24 h after incubation with undoped and Cu-doped (15.0 wt%) CaP supraparticles. The diagrams display the results of quantitative analysis of fluorescence micrographs from 3 independent experiments and 9 photos of each sample  $\pm$  SEM. The analysis was performed using ZEISS ZEN 2.6 Pro software and the ZEN Intellesis module.



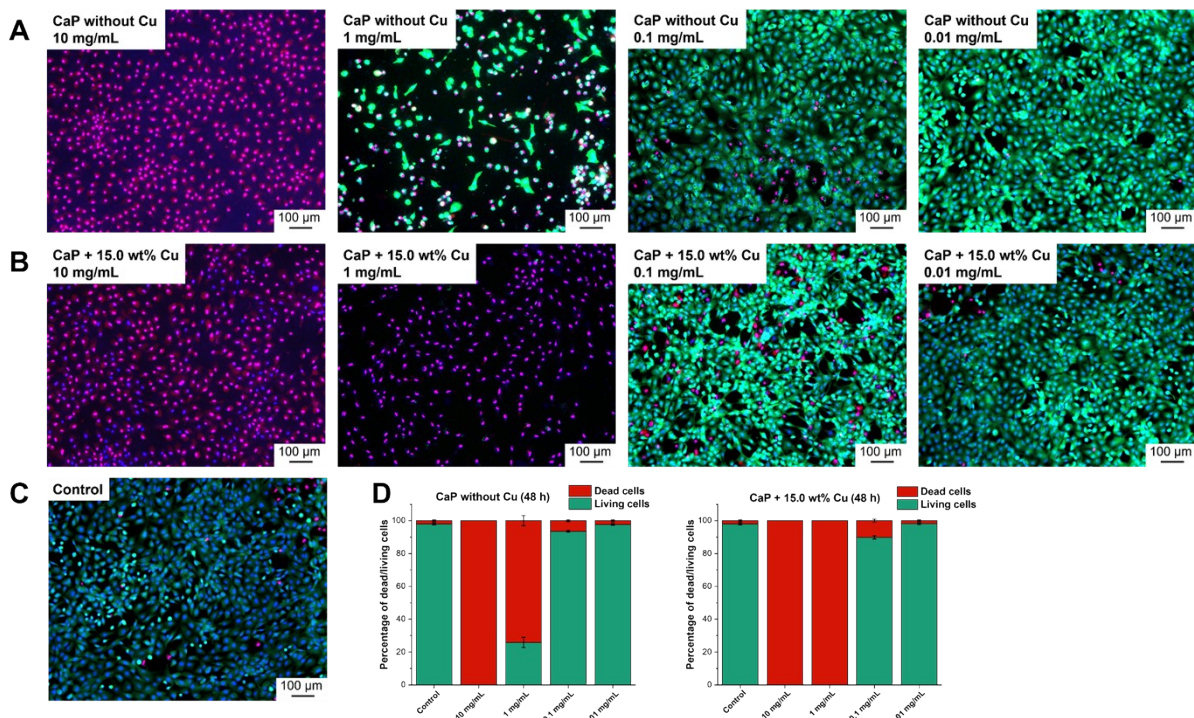

**Figure S6.** (A) Live/dead staining 48 h after incubation with CaP supraparticles without (A) and with 15.0 wt% Cu (B) as well as of the control (C). **Green:** Fluorescence signal of living cells. **Magenta:** Fluorescence signal of dead cells. **Blue:** Fluorescence of cell nucleus. Representative images of three independent experiments are shown. (D) Percentage of dead/living cells of live/dead staining 48 h after incubation with undoped and Cu-doped (15.0 wt%) CaP supraparticles. The diagrams display the results of quantitative analysis of fluorescence micrographs from 3 independent experiments and 9 photos of each sample  $\pm$  SEM. The analysis was performed using ZEISS ZEN 2.6 Pro software and the ZEN Intellesis module.

**S7. Coating and characterization:** Prior to the coating process, a water-based suspension containing commercial  $\beta$ -TCP raw powder (5.0 wt%, Budenheim) and stabilizing agents (phosphonate-based (3.0 wt% of solid content) and hydrocolloid (2.0 wt% of total suspension)) was prepared. Subsequently, the Cu-doped CaP supraparticles (0.5 wt%) dispersed in water were introduced into the aforementioned suspension. Coating on Ti substrates (ARA-T Advance GmbH) was then performed using the HVFS process as described by Killinger et al.<sup>1</sup>

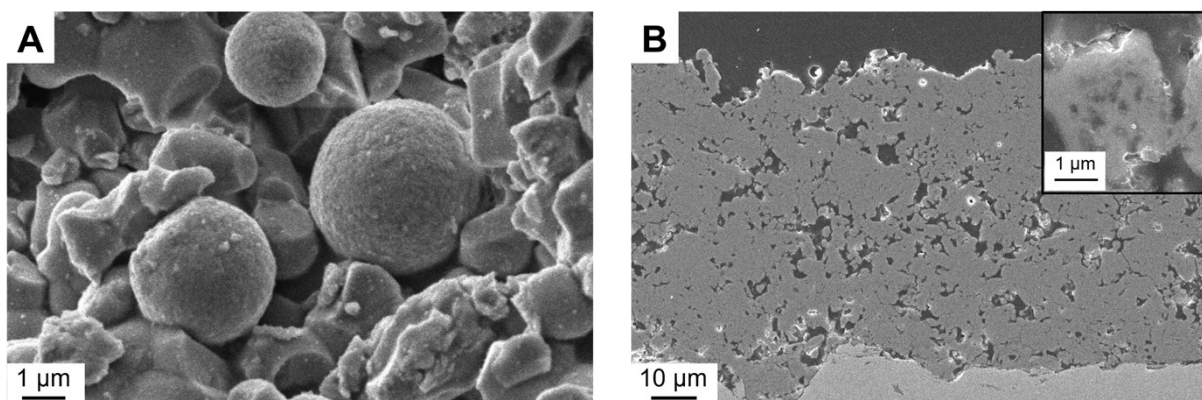

**Figure S7.** (A) SEM image of dried water suspension containing Cu-doped CaP supraparticles (0.5 wt%) and commercial  $\beta$ -TCP raw powder (5.0 wt%). (B) SEM-image of  $\beta$ -TCP coating with incorporated Cu-doped CaP supraparticles on Ti substrate with detail of one incorporated supraparticle (top, right).

## References

1. A. Killinger, M. Kuhn and R. Gadow, *Surface and Coatings Technology*, 2006, **201**, 1922.
